# Supplementary material for: Symptom Interconnectivity in Multiple Sclerosis: A Narrative Review of Potential Underlying Biological Disease Processes
Source: PubMed Central journal article supplement — Neurol Ther. 2022 Jun 9;11(3):1043–70. doi: 10.1007/s40120-022-00368-2 (PMC9338216; doi:10.1007/s40120-022-00368-2), 2022-06-09
Supplement: 40120_2022_368_MOESM1_ESM.pdf [file 40120_2022_368_MOESM1_ESM.pdf]

# **Symptom interconnectivity in multiple sclerosis: A narrative review of potential underlying biological disease processes – *supplementary material***

Tanuja Chitnis,<sup>1\*</sup> Jo Vandercappellen,<sup>2</sup> Miriam King,<sup>2</sup> Giampaolo Brichetto<sup>3</sup>

<sup>1</sup>Brigham and Women's Hospital, Department of Neurology, 75 Francis Street, Boston, MA 02115, USA

<sup>2</sup>Novartis Pharma AG, Fabrikstrasse 12 -2, CH-4056, Basel, Switzerland

<sup>3</sup>Associazione Italiana Sclerosi Multipla Rehabilitation Center, Via Operai, 30, 16149 Genoa GE, Italy

\*Corresponding author: Brigham and Women's Hospital, Department of Neurology, 75 Francis Street, Boston, MA 02115, USA, [tchitnis@rics.bwh.harvard.edu](mailto:tchitnis@rics.bwh.harvard.edu)



|                                                                                                                                                                                           |                                    |            |    |         |            |      |  |      |              |              |  |          |  |
|-------------------------------------------------------------------------------------------------------------------------------------------------------------------------------------------|------------------------------------|------------|----|---------|------------|------|--|------|--------------|--------------|--|----------|--|
| Widespread cortical thinning characterizes patients with MS with mild cognitive impairment                                                                                                | 10.1212/WNL.0b013e3181cbcd03       | 20101038   | CI |         |            |      |  |      | Neuroanatomy |              |  |          |  |
| Memory performance in multiple sclerosis patients correlates with central brain atrophy                                                                                                   | 10.1191/1352458506ms1266oa         | 16900756   | CI |         |            |      |  |      | Neuroanatomy |              |  |          |  |
| Relevance of brain lesion location to cognition in relapsing multiple sclerosis                                                                                                           | 10.1371/journal.pone.0044826       | 23144775   | CI |         |            |      |  |      | Neuroanatomy |              |  |          |  |
| Predictive value of different conventional and non-conventional MRI-parameters for specific domains of cognitive function in multiple sclerosis                                           | 10.1016/j.nicl.2015.02.023         | 25944323   | CI |         |            |      |  |      | Neuroanatomy |              |  |          |  |
| MRI predictors of cognitive outcome in early multiple sclerosis                                                                                                                           | 10.1212/WNL.0b013e318212980e       | 21444931   | CI |         |            |      |  |      | Neuroanatomy |              |  |          |  |
| Brain pathways of verbal working memory: a lesion-function correlation study                                                                                                              | 10.1016/j.neuroimage.2009.04.054   | 19393745   | CI |         |            |      |  |      | Neuroanatomy |              |  |          |  |
| Cognitive impairment as marker of diffuse brain abnormalities in early relapsing remitting multiple sclerosis                                                                             | 10.1136/jnnp.2004.045872           | 15774439   | CI |         |            |      |  |      | Neuroanatomy |              |  |          |  |
| Cortical demyelination in multiple sclerosis: a substrate for cognitive deficits?                                                                                                         | 10.1016/j.jns.2005.09.021          | 16650874   | CI |         |            |      |  |      | Neuroanatomy |              |  |          |  |
| Thalamus structure and function determine severity of cognitive impairment in multiple sclerosis                                                                                          | 10.1212/WNL.0000000000001285       | 25616483   | CI |         |            |      |  |      | Neuroanatomy |              |  |          |  |
| Gray and white matter brain atrophy and neuropsychological impairment in multiple sclerosis                                                                                               | 10.1212/01.wnl.0000021238.93586.d9 | 16534104   | CI |         |            |      |  |      | Neuroanatomy |              |  |          |  |
| Executive function in multiple sclerosis: The role of frontal lobe pathology                                                                                                              | 10.1093/brain/120.1.15             | 901794     | CI |         |            |      |  |      | Neuroanatomy |              |  |          |  |
| Regional magnetic resonance imaging lesion burden and cognitive function in multiple sclerosis: a longitudinal study                                                                      | 10.1001/archneur.58.11.115         | 11176944   | CI |         |            |      |  |      | Neuroanatomy |              |  |          |  |
| Cognitive impairment in MS: impact of white matter integrity, gray matter volume, and lesions                                                                                             | 10.1212/WNL.0b013e31828726cc       | 23468546   | CI |         |            |      |  |      | Neuroanatomy |              |  |          |  |
| Superior temporal gyrus thickness correlates with cognitive performance in multiple sclerosis                                                                                             | 10.1007/s00429-012-0440-3          | 22790785   | CI |         |            |      |  |      | Neuroanatomy |              |  |          |  |
| Compensatory cortical activation observed by fMRI during a cognitive task at the earliest stage of MS                                                                                     | 10.1002/hbm.10128                  | 14505331   | CI |         |            |      |  |      | Neuroanatomy |              |  |          |  |
| Efficiency of cognitive control recruitment in the very early stage of multiple sclerosis: a one-year fMRI follow-up study                                                                | 10.1177/1352458508089360           | 18573836   | CI |         |            |      |  |      | Neuroanatomy |              |  |          |  |
| Neocortical atrophy, third ventricular width, and cognitive dysfunction in multiple sclerosis                                                                                             | 10.1001/archneur.63.9.1301         | 16966509   | CI |         |            |      |  |      | Neuroanatomy |              |  |          |  |
| Diffusion-weighted imaging predicts cognitive impairment in multiple sclerosis                                                                                                            | 10.1177/1352458507075592           | 17613599   | CI |         |            |      |  |      | Neuroanatomy |              |  |          |  |
| The correlation between ventricular diameter measured by transcranial sonography and clinical disability and cognitive dysfunction in patients with multiple sclerosis                    | 10.1001/archneur.57.9.1289         | 10987895   | CI |         |            |      |  |      | Neuroanatomy |              |  |          |  |
| Bicaudate ratio as a magnetic resonance imaging marker of brain atrophy in multiple sclerosis                                                                                             | 10.1001/archneur.59.2.275          | 11843699   | CI |         |            |      |  |      | Neuroanatomy |              |  |          |  |
| Structural connectivity influences brain activation during PVSAT in Multiple Sclerosis                                                                                                    | 10.1016/j.neuroimage.2008.08.015   | 18790063   | CI |         |            |      |  |      | Neuroanatomy |              |  |          |  |
| Cognitive impairment is associated with subcortical magnetic resonance imaging gray matter T2 hypointensity in multiple sclerosis                                                         | 10.1191/1352458506ms1301oa         | 16900757   | CI |         |            |      |  |      | Neuroanatomy |              |  |          |  |
| Reduced brain functional reserve and altered functional connectivity in patients with multiple sclerosis                                                                                  | 10.1093/brain/awh670               | 16251244   | CI |         |            |      |  |      | Neuroanatomy |              |  |          |  |
| Cognitive function in primary progressive and transitional progressive multiple sclerosis: a controlled study with MRI correlates                                                         | 10.1093/brain/awz122.7.1341        | 1036876939 | CI |         |            |      |  |      | Neuroanatomy |              |  |          |  |
| Cerebral activation patterns during working memory performance in multiple sclerosis using fMRI                                                                                           | 10.1080/13803390513609             | 15814441   | CI |         |            |      |  |      | Neuroanatomy |              |  |          |  |
| Brain magnetic resonance imaging correlates of cognitive impairment in multiple sclerosis                                                                                                 | 10.1016/0022-510X(93)90212-H       | 8340796    | CI |         |            |      |  |      | Neuroanatomy |              |  |          |  |
| The unique impact of changes in normal appearing brain tissue on cognitive dysfunction in secondary progressive multiple sclerosis patients                                               | 10.1191/1352458504ms1095oa         | 15584486   | CI |         |            |      |  |      | Neuroanatomy |              |  |          |  |
| Correlates of executive function in multiple sclerosis: the use of magnetic resonance spectroscopy as an index of focal pathology                                                         | 10.1176/jnp.11.1.45                | 9990555    | CI |         |            |      |  |      | Neuroanatomy |              |  |          |  |
| Correlation of neuropsychological and MRI findings in chronic/progressive multiple sclerosis                                                                                              | 10.1212/wml.38.12.1826             | 3194059    | CI |         |            |      |  |      | Neuroanatomy |              |  |          |  |
| Cognitive dysfunction in early multiple sclerosis: altered centrally derived from resting-state functional connectivity using magneto-encephalography                                     | 10.1371/journal.pone.0042087       | 22848712   | CI |         |            |      |  |      | Neuroanatomy |              |  |          |  |
| Neuropsychological impairment in multiple sclerosis patients: the role of (sub)cortical lesion on FLAIR                                                                                   | 10.1177/1352458506004010           | 10062549   | CI |         |            |      |  |      | Neuroanatomy |              |  |          |  |
| fMRI evidence of brain reorganization during attention and memory tasks in multiple sclerosis                                                                                             | 10.1016/j.neuroimage.2003.10.004   | 15006652   | CI |         |            |      |  |      | Neuroanatomy |              |  |          |  |
| Correlation of global N-acetyl aspartate with cognitive impairment in multiple sclerosis                                                                                                  | 10.1001/archneur.63.4.533          | 16606765   | CI |         |            |      |  |      | Neuroanatomy |              |  |          |  |
| Corpus callosum damage and cognitive dysfunction in benign MS                                                                                                                             | 10.1002/hbm.20692                  | 19067325   | CI |         |            |      |  |      | Neuroanatomy |              |  |          |  |
| Genotype-Phenotype correlations in multiple sclerosis: HLA genes influence disease severity inferred by 1HMR spectroscopy and MRI measures                                                | 10.1093/brain/aww301               | 19022862   | CI |         |            |      |  |      | Neuroanatomy |              |  |          |  |
| Cognitive Dysfunction Laterizes With NAA in Multiple Sclerosis                                                                                                                            | 10.1207/RS15324826AN0803_4         | 11688650   | CI |         |            |      |  |      | Neuroanatomy |              |  |          |  |
| Potentially adaptive functional changes in cognitive processing for patients with multiple sclerosis and their acute modulation by rivastigmine                                           | 10.1093/brain/aww284               | 12958082   | CI |         |            |      |  |      | Neuroanatomy |              |  |          |  |
| Analysis of impairment related functional architecture in MS patients during performance of different attention tasks                                                                     | 10.1007/980415-003-1025-0          | 12700913   | CI |         |            |      |  |      | Neuroanatomy |              |  |          |  |
| Longitudinal study of cognitive dysfunction in multiple sclerosis: neuropsychological, neuroradiological, and neurophysiological findings                                                 | 10.1136/jnnp.74.7.878              | 12807711   | CI |         |            |      |  |      | Neuroanatomy |              |  |          |  |
| Differences in cerebral activation patterns in idiopathic inflammatory demyelination using the paced visual serial addition task: an fMRI study                                           | 10.1016/j.jns.2005.11.035          | 16480742   | CI |         |            |      |  |      | Neuroanatomy |              |  |          |  |
| Structural and functional surrogates of cognitive impairment at the very early stage of multiple sclerosis                                                                                | 10.1016/j.jns.2005.09.019          | 16631206   | CI |         |            |      |  |      | Neuroanatomy |              |  |          |  |
| Structural and functional MRI correlates of Stroop control in benign MS                                                                                                                   | 10.1002/hbm.20504                  | 18041737   | CI |         |            |      |  |      | Neuroanatomy |              |  |          |  |
| Relation between MRI abnormalities and patterns of cognitive impairment in multiple sclerosis                                                                                             | 10.1212/WNL.50.8.1601              | 9633700    | CI |         |            |      |  |      | Neuroanatomy |              |  |          |  |
| Cortical/subcortical disease burden and cognitive impairment in patients with multiple sclerosis                                                                                          | 10.1093/brain/awz122.7.1341        | 1036876939 | CI |         |            |      |  |      | Neuroanatomy |              |  |          |  |
| Cognitive dysfunction in patients with mildly disabling relapsing-remitting multiple sclerosis: an exploratory study with diffusion tensor MR imaging                                     | 10.1016/S0022-510X(01)00690-6      | 11897239   | CI |         |            |      |  |      | Neuroanatomy |              |  |          |  |
| Brain atrophy as a marker of cognitive impairment in mildly disabling relapsing-remitting multiple sclerosis                                                                              | 10.1111/j.1468-1331.2008.02259.x   | 18727673   | CI |         |            |      |  |      | Neuroanatomy |              |  |          |  |
| Functional imaging during covert auditory attention in multiple sclerosis                                                                                                                 | 10.1016/j.jns.2003.10.019          | 14759627   | CI |         |            |      |  |      | Neuroanatomy |              |  |          |  |
| fMRI investigation of disinhibition in cognitively impaired patients with multiple sclerosis                                                                                              | 10.1016/j.jns.2009.02.366          | 19344919   | CI |         |            |      |  |      | Neuroanatomy |              |  |          |  |
| Cognitive function and fMRI in patients with multiple sclerosis: evidence for compensatory cortical activation during an attention task                                                   | 10.1093/brain/awf125               | 12023316   | CI |         |            |      |  |      | Neuroanatomy |              |  |          |  |
| Magnetic resonance spectroscopy of memory and frontal brain region in early multiple sclerosis                                                                                            | 10.1176/jnp.17.3.367               | 16178693   | CI |         |            |      |  |      | Neuroanatomy |              |  |          |  |
| Cognitive impairment in relapsing-remitting multiple sclerosis can be predicted by imaging performed several years earlier                                                                | 10.1177/1352458507082353           | 17866503   | CI |         |            |      |  |      | Neuroanatomy |              |  |          |  |
| Cognitive impairment in multiple sclerosis can be predicted by imaging early in the disease                                                                                               | 10.1136/jnnp.2007.138685           | 18339729   | CI |         |            |      |  |      | Neuroanatomy |              |  |          |  |
| Functional magnetic resonance imaging of working memory among multiple sclerosis patients                                                                                                 | 10.1111/j.1552-6569.2004.tb00232.x | 15095561   | CI |         |            |      |  |      | Neuroanatomy |              |  |          |  |
| Functional magnetic resonance imaging response to increased verbal working memory demands among patients with multiple sclerosis                                                          | 10.1002/hbm.20163                  | 16001441   | CI |         |            |      |  |      | Neuroanatomy |              |  |          |  |
| Neuropsychological and structural brain lesions in multiple sclerosis: a regional analysis                                                                                                | 10.1212/wml.42.7.1291              | 1620336    | CI |         |            |      |  |      | Neuroanatomy |              |  |          |  |
| Cognitive decline in multiple sclerosis: impact of topographic lesion distribution on differential cognitive deficit patterns                                                             | 10.1177/1352458508106853           | 19667010   | CI |         |            |      |  |      | Neuroanatomy |              |  |          |  |
| Occurrence of neuronal dysfunction during the first 5 years of multiple sclerosis is associated with cognitive deterioration                                                              | 10.1007/s00415-010-5845-4          | 21132325   | CI |         |            |      |  |      | Neuroanatomy |              |  |          |  |
| Relationship between frontal lobe lesions and Wisconsin Card Sorting Test performance in patients with multiple sclerosis                                                                 | 10.1212/wml.44.3.part.1.420        | 8145908    | CI |         |            |      |  |      | Neuroanatomy |              |  |          |  |
| An investigation of working memory rehearsal in multiple sclerosis using fMRI                                                                                                             | 10.1076/cen.25.7.965.16490         | 13680443   | CI |         |            |      |  |      | Neuroanatomy |              |  |          |  |
| fMRI study of episodic memory in relapsing-remitting MS: correlation with T2 lesion volume                                                                                                | 10.1212/01.wnl.0000242885.71725.76 | 17101897   | CI |         |            |      |  |      | Neuroanatomy |              |  |          |  |
| Magnetic resonance study of the influence of tissue damage and cortical reorganization on PASAT performance at the earliest stage of multiple sclerosis                                   | 10.1002/hbm.20083                  | 15543553   | CI |         |            |      |  |      | Neuroanatomy |              |  |          |  |
| Posterior brain damage and cognitive impairment in pediatric multiple sclerosis                                                                                                           | 10.1212/WNL.0000000000000309       | 24647027   | CI |         |            |      |  |      | Neuroanatomy |              |  |          |  |
| Impaired functional integration in multiple sclerosis: a graph theory study                                                                                                               | 10.1007/s00429-014-0896-4          | 25618633   | CI |         |            |      |  |      | Neuroanatomy |              |  |          |  |
| Subcortical atrophy and cognition: sex effects in multiple sclerosis                                                                                                                      | 10.1212/WNL.0b013e3182703f46       | 23019265   | CI |         |            |      |  |      | Neuroanatomy |              |  |          |  |
| Cortical lesion load associates with progression of disability in multiple sclerosis                                                                                                      | 10.1093/brain/aww246               | 23065788   | CI |         |            |      |  |      | Neuroanatomy |              |  |          |  |
| Gray matter damage predicts the accumulation of disability 13 years later in MS                                                                                                           | 10.1212/01.wnl.0000435551.90824.d0 | 24122185   | CI |         |            |      |  |      | Neuroanatomy |              |  |          |  |
| Modulation of effective connectivity inside the working memory network in patients at the earliest stage of multiple sclerosis                                                            | 10.1016/j.neuroimage.2004.08.038   | 15627595   | CI |         |            |      |  |      | Neuroanatomy |              |  |          |  |
| Trigeminal neuralgia due to multiple sclerosis: ultrastructural findings in trigeminal rhizotomy specimens                                                                                | 10.1046/j.0305-1846.2001.00318.x   | 11489143   |    |         |            |      |  | Pain | Neuroanatomy | Inflammation |  |          |  |
| Hypothalamic damage in multiple sclerosis correlates with disease activity, disability, depression, and fatigue                                                                           | 10.1080/01616412.2016.1275460      | 28191860   |    | Fatigue | Depression |      |  |      | Neuroanatomy |              |  |          |  |
| Smaller cornu ammonis 2-3/dentate gyrus volumes and elevated cortisol in multiple sclerosis patients with depressive symptoms                                                             | 10.1016/j.bpsych.2010.04.025       | 20846680   |    |         | Depression |      |  |      | Neuroanatomy |              |  | HPA axis |  |
| Mood disorders and dysfunction of the hypothalamic-pituitary-adrenal axis in multiple sclerosis: association with cerebral inflammation                                                   | 10.1001/archneur.55.1.66           | 9443712    |    |         | Depression |      |  |      | Neuroanatomy | Inflammation |  | HPA axis |  |
| Widespread pressure pain hypersensitivity in patients with multiple sclerosis with and without pain as sign of central sensitization                                                      | 10.1097/AJP.0000000000000084       | 24525905   |    | Fatigue | Depression | Pain |  |      | Neuroanatomy |              |  |          |  |
| Fatigue in multiple sclerosis patients with different clinical phenotypes: a clinical and magnetic resonance imaging study                                                                | 10.1111/ene.14471                  | 32780554   |    | Fatigue | Depression |      |  |      | Neuroanatomy |              |  |          |  |
| Different cortical underpinnings for fatigue and depression in MS?                                                                                                                        | 10.1016/j.msard.2016.02.005        | 27036229   |    | Fatigue | Depression |      |  |      | Neuroanatomy |              |  |          |  |
| Fluctuations of spontaneous EEG topographies predict disease state in relapsing-remitting multiple sclerosis                                                                              | 10.1016/j.nicl.2016.08.008         | 27625987   |    | Fatigue | Depression |      |  |      | Neuroanatomy |              |  |          |  |
| Selective Cerebellar Atrophy Associates with Depression and Fatigue in the Early Phases of Relapse-Onset Multiple Sclerosis                                                               | 10.1007/s12311-016-0196-4          | 31896280   |    | Fatigue | Depression |      |  |      | Neuroanatomy |              |  |          |  |
| Influence of the topography of brain damage on depression and fatigue in patients with multiple sclerosis                                                                                 | 10.1177/1352458513493684           | 23019264   |    | Fatigue | Depression |      |  |      | Neuroanatomy |              |  |          |  |
| History of fatigue in multiple sclerosis is associated with gray matter atrophy                                                                                                           | 10.1038/s41598-019-51110-2         | 31611598   |    | Fatigue | Depression |      |  |      | Neuroanatomy |              |  |          |  |
| Microstructural fronto-striatal and temporo-insular alterations are associated with fatigue in patients with multiple sclerosis independent of white matter lesion load and depression    | 10.1177/1352458519869185           | 31418637   |    | Fatigue |            |      |  |      | Neuroanatomy |              |  |          |  |
| Neurophysiological, radiological and neuropsychological evaluation of fatigue in multiple sclerosis                                                                                       | 10.1016/j.msard.2018.12.029        | 30594815   |    | Fatigue |            |      |  |      | Neuroanatomy |              |  |          |  |
| On the role of the amygdala for experiencing fatigue in patients with multiple sclerosis                                                                                                  | 10.1016/j.msard.2017.12.014        | 29306741   |    | Fatigue |            |      |  |      | Neuroanatomy |              |  |          |  |
| Resting-state functional connectivity networks associated with fatigue in multiple sclerosis with early age onset                                                                         | 10.1016/j.msard.2019.03.020        | 30954931   |    | Fatigue |            |      |  |      | Neuroanatomy |              |  |          |  |
| Structural and cognitive correlates of fatigue in progressive multiple sclerosis                                                                                                          | 10.1080/01616412.2018.1547813      | 30513278   |    | Fatigue |            |      |  |      | Neuroanatomy |              |  |          |  |
| Fatigue in multiple sclerosis is associated with the disruption of frontal and parietal pathways                                                                                          | 10.1177/1352458508098373           | 18887107   |    | Fatigue |            |      |  |      | Neuroanatomy |              |  |          |  |
| Cerebellar abnormalities contribute to disability including cognitive impairment in multiple sclerosis                                                                                    | 10.1371/journal.pone.0086916       | 24466290   |    | Fatigue |            |      |  |      | Neuroanatomy |              |  |          |  |
| Correlation between fatigue and brain atrophy and lesion load in multiple sclerosis patients independent of disability                                                                    | 10.1016/j.jns.2007.07.004          | 17673234   |    | Fatigue |            |      |  |      | Neuroanatomy |              |  |          |  |
| Association of fatigue and brain atrophy in multiple sclerosis                                                                                                                            | 10.1016/j.jns.2004.11.046          | 15694198   |    | Fatigue |            |      |  |      | Neuroanatomy |              |  |          |  |
| Regional brain atrophy in primary fatigued patients with multiple sclerosis                                                                                                               | 10.1016/j.neuroimage.2009.12.118   | 20060048   |    | Fatigue |            |      |  |      | Neuroanatomy |              |  |          |  |
| Fatigue and progression of corpus callosum atrophy in multiple sclerosis                                                                                                                  | 10.1007/s00415-011-4091-0          | 21694686   |    | Fatigue |            |      |  |      | Neuroanatomy |              |  |          |  |
| Regional brain atrophy and functional connectivity changes related to fatigue in multiple sclerosis                                                                                       | 10.1371/journal.pone.0077514       | 24167598   |    | Fatigue |            |      |  |      | Neuroanatomy |              |  |          |  |
| Fatigue is associated with metabolic and density alterations of cortical and deep gray matter in relapsing-remitting-multiple sclerosis patients at the earlier stage of the disease: A P | 10.1016/j.msard.2013.03.005        | 25877847   |    | Fatigue |            |      |  |      | Neuroanatomy |              |  |          |  |
| Yovelwise assessment of the regional distribution of damage in the brains of patients with multiple sclerosis and fatigue                                                                 | 10.3174/ajnr.A2412                 | 21939405   |    | Fatigue |            |      |  |      | Neuroanatomy |              |  |          |  |
| Basal ganglia and frontal/parietal cortical atrophy is associated with fatigue in relapsing-remitting multiple sclerosis                                                                  | 10.1177/1352458510376405           | 20670981   |    | Fatigue |            |      |  |      | Neuroanatomy |              |  |          |  |
| Relationship of cortical atrophy to fatigue in patients with multiple sclerosis                                                                                                           | 10.1001/archneur.2010.48           | 20385911   |    | Fatigue |            |      |  |      | Neuroanatomy |              |  |          |  |
| Neural correlates of cognitive fatigue in multiple sclerosis using functional MRI                                                                                                         | 10.1016/j.jns.2008.01.018          | 18336838   |    | Fatigue |            |      |  |      | Neuroanatomy |              |  |          |  |
| Functional MRI during the execution of a motor task in patients with multiple sclerosis and fatigue                                                                                       | 10.1007/s11547-012-0845-3          | 22729506   |    | Fatigue |            |      |  |      | Neuroanatomy |              |  |          |  |
